# Supplementary material for: Is methotrexate safe for men with an immune-mediated inflammatory disease and an active desire to become a father? Results of a prospective cohort study (iFAME-MTX)
Source: HighWire-hosted journal article supplement (doi:10.1136/ard-2023-224032), 2023-06-01
Supplement: ard-2023-224032supp001_data_supplement.pdf [file ard-2023-224032supp001_data_supplement.pdf]

Table 1. Exclusion criteria

| MTX-naive and MTX chronic                                                                                                                                                                                                                                                                                                                                                                                                                                                                              | Healthy controls                                                                                                                                                                                                                                                                                                                                                                                                                                                                                                                              |
|--------------------------------------------------------------------------------------------------------------------------------------------------------------------------------------------------------------------------------------------------------------------------------------------------------------------------------------------------------------------------------------------------------------------------------------------------------------------------------------------------------|-----------------------------------------------------------------------------------------------------------------------------------------------------------------------------------------------------------------------------------------------------------------------------------------------------------------------------------------------------------------------------------------------------------------------------------------------------------------------------------------------------------------------------------------------|
| <ul style="list-style-type: none"> <li>• Age above 55 years.</li> <li>• Known infertility (Self-report).</li> <li>• Current use of drugs listed in Table 2.</li> <li>• Current sexually transmitted disease (Self-report).</li> <li>• Current lower urinary tract infection (Self-report).</li> <li>• Active infection with Hepatitis B or C virus (Self-report).</li> <li>• Human immunodeficiency virus (HIV) infection (Self-report).</li> <li>• Vasectomy.</li> <li>• Language barrier.</li> </ul> | <ul style="list-style-type: none"> <li>• Age above 55 years.</li> <li>• Known infertility (Self-report).</li> <li>• Current or past use of Methotrexate.</li> <li>• Current use of any medication.</li> <li>• Current sexually transmitted disease (Self-report).</li> <li>• Current lower urinary tract infection (Self-report).</li> <li>• Active infection with Hepatitis B or C virus (Self-report).</li> <li>• Human immunodeficiency virus (HIV) infection (Self-report).</li> <li>• Vasectomy.</li> <li>• Language barrier.</li> </ul> |

Table 2. Exclusion criteria – current use of the following drugs (FDA-report of approved drugs that have the potential to impair human spermatogenesis) (29).

|                            |                   |
|----------------------------|-------------------|
| Methadone hydrochloride    | Nitrofurantoin    |
| Dapsone                    | Paroxetine        |
| Fluvoxamine maleate        | Nifedipine        |
| Colchicine                 | Cortisone acetate |
| Dexamethasone              | Methylprednisone  |
| Prednisone (>7.5 mg/day)   | Sulfasalazine     |
| Triamcinolone hexacetonide | Busulfan          |
| Chlorambucil               | Cyclophosphamide  |
| Dabrafenib                 | Degarelix         |
| Fludarabine                | Mercaptopurine    |
| Procarbazine               | Triptorelin       |
| Vinblastine                | Vinorelbine       |
| Testosterone               |                   |
